# Supplementary material
Source: Springer Nature journal article supplement (https://www.springermedizin.de/resource/supplementary/13054_2012_2979_MOESM3_ESM.pdf/9712290)

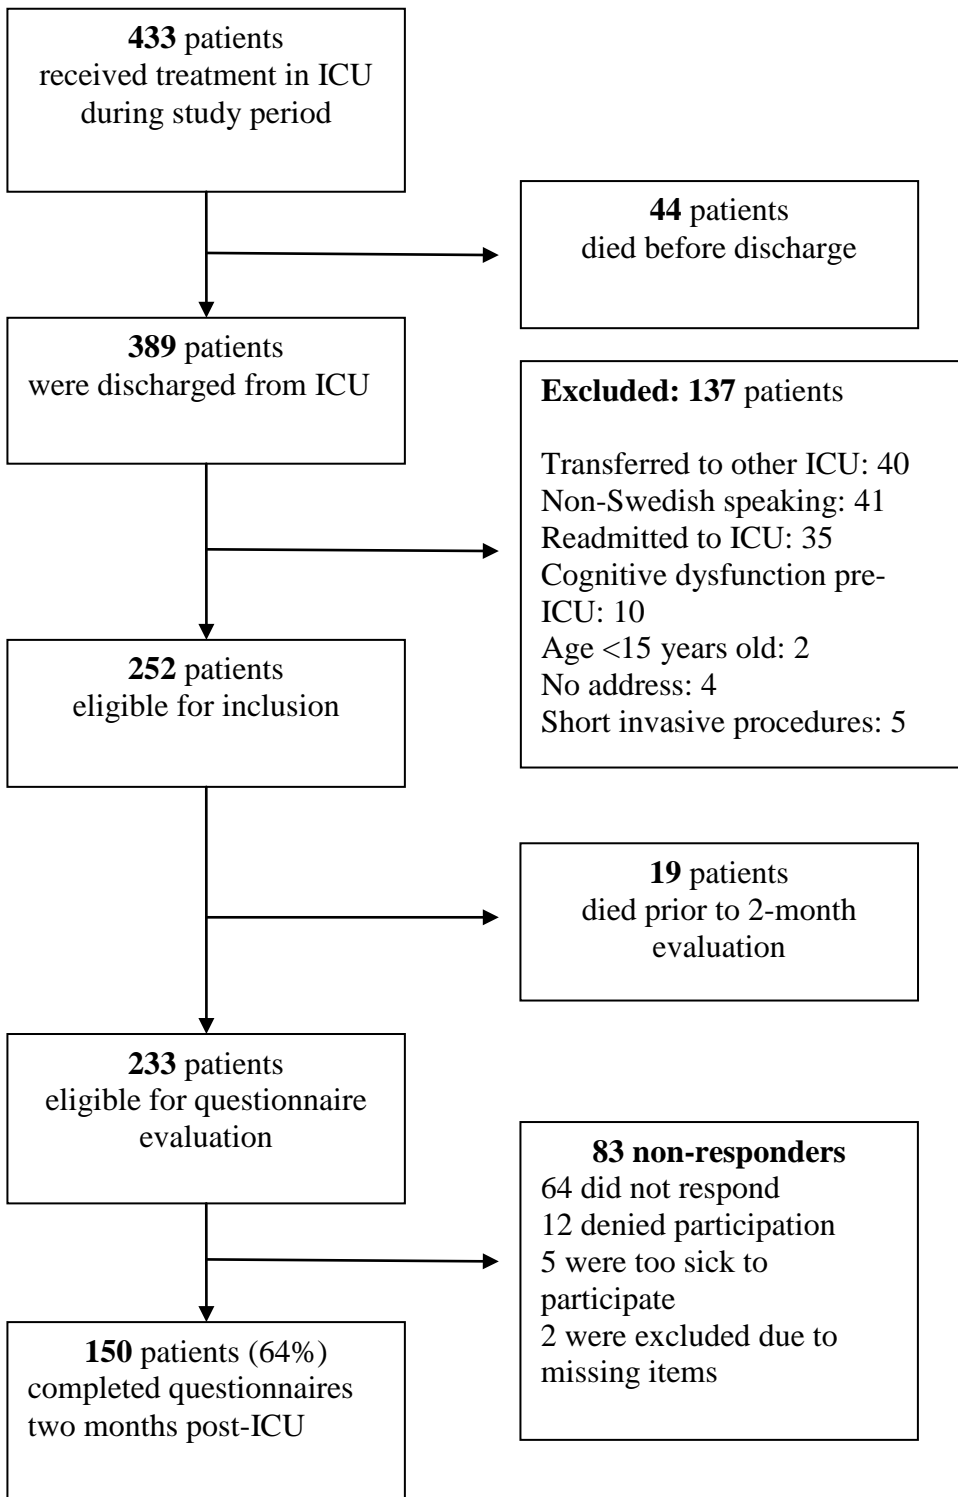

Supplement: MOESM3 [file 9712290]
